# Supplementary material for: Retinoic Acid Synthesis Deficiency Fosters the Generation of Polymorphonuclear Myeloid-Derived Suppressor Cells in Colorectal Cancer
Source: Oxford University Press journal article supplement (doi:10.1158/2326-6066.cir-20-0389), 2020-11-11
Supplement: 23266066cir200389-sup-242986_3_supp_6679253_q555dd.pdf [file 23266066cir200389-sup-242986_3_supp_6679253_q555dd.pdf]

# 1 **Supplementary Data for**

2 **Retinoic acid synthesis deficiency fosters the generation of**

3 **polymorphonuclear myeloid-derived suppressor cells in colorectal cancer**

4 Hong-Wei Sun<sup>†</sup>, Jing Chen<sup>†</sup>, Wen-Chao Wu, Yan-Yan Yang, Yi-Tuo Xu, Xing-Juan Yu, Hai-Tian  
5 Chen, Zilian Wang, Xiao-Jun Wu<sup>\*</sup>, Limin Zheng<sup>\*</sup>

6 <sup>†</sup> These authors contributed equally to this work

7 <sup>\*</sup> Corresponding Author

8

9 **Supplementary Figures**

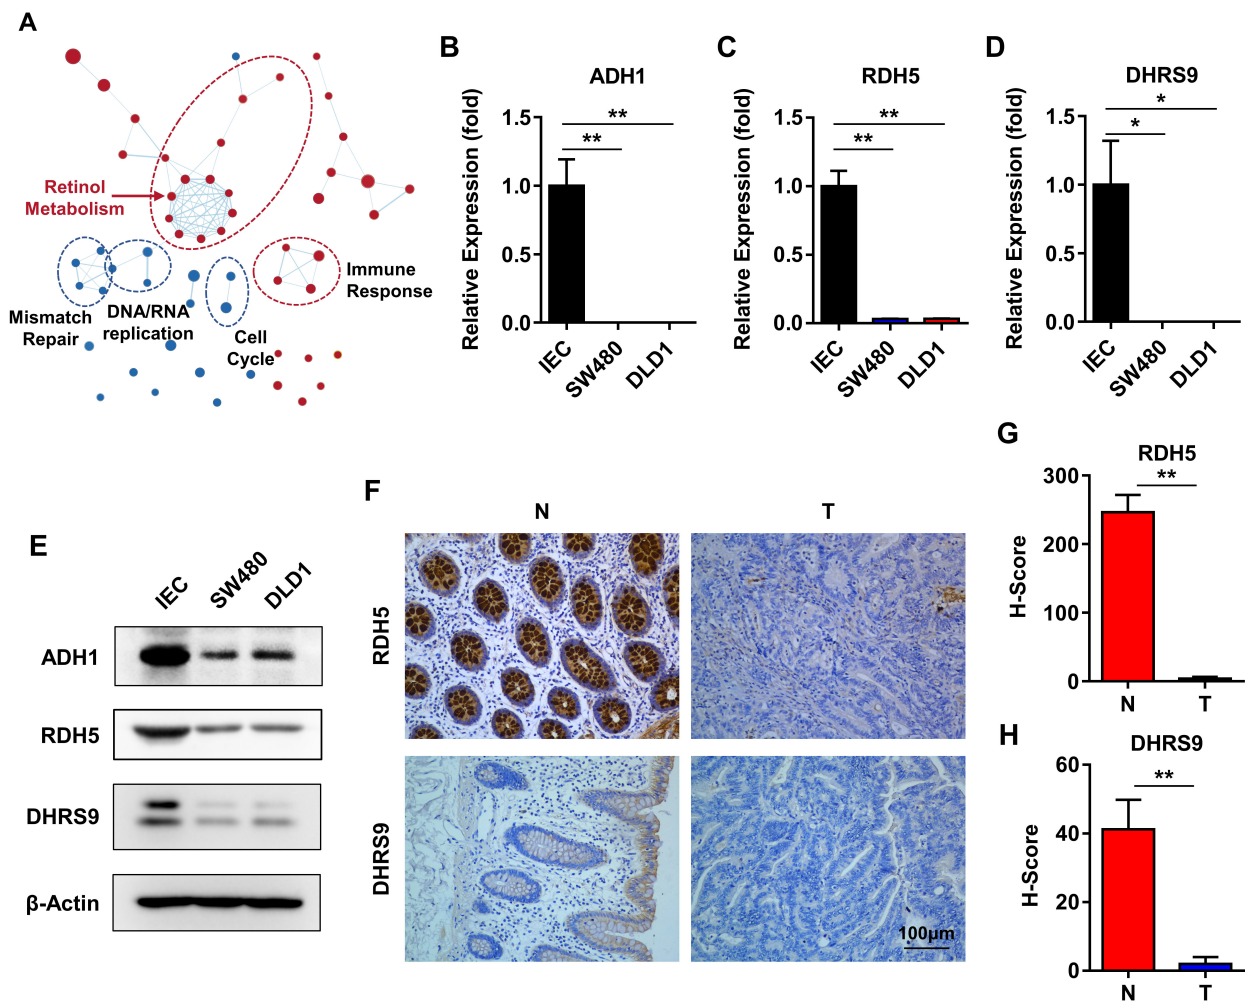

10

11 **Figure S1.**

12 **Retinol metabolism is significantly downregulated in colorectal cancer.** (A) The gene set  
13 c2.cp.kegg.v5.2.symbols from the Molecular Signatures Database-MsigDB was applied for GSEA  
14 analysis between CRC tissues (blue) and adjacent colonic tissues expression (red). Cytoscape and  
15 Enrichment map were used for visualization of the GSEA results (p value cutoff: 0.1). Enrichment  
16 results were mapped as a network of gene sets. Nodes represent enriched gene sets, which were  
17 grouped by their similarities according to the related gene sets. (B - D) Relative expression of  
18 ADH1 (B), RDH5 (C) and DHRS9 (D) in intestinal epithelial cells (IEC) and CRC cell line SW480  
19 and DLD1 were determined by quantitative RT-PCR. Data represents three samples and are shown

20 as means  $\pm$  SEM. \*,  $P < 0.05$ , \*\*,  $P < 0.01$ . (E) Immunoblots for ADH1, RDH5 and DHRS9 in IEC  
21 and CRC cell line SW480 and DLD1. (F - H) IHC staining showed RDH5 and DHRS9 expression  
22 in human CRC tissue (F). RDH5 (G) and DHRS9 (H) expression on tumor (T) and adjacent  
23 non-tumor tissues (N) from five patients were scored and summarized as means  $\pm$  SEM. \*\*,  $P <$   
24 0.01.

25

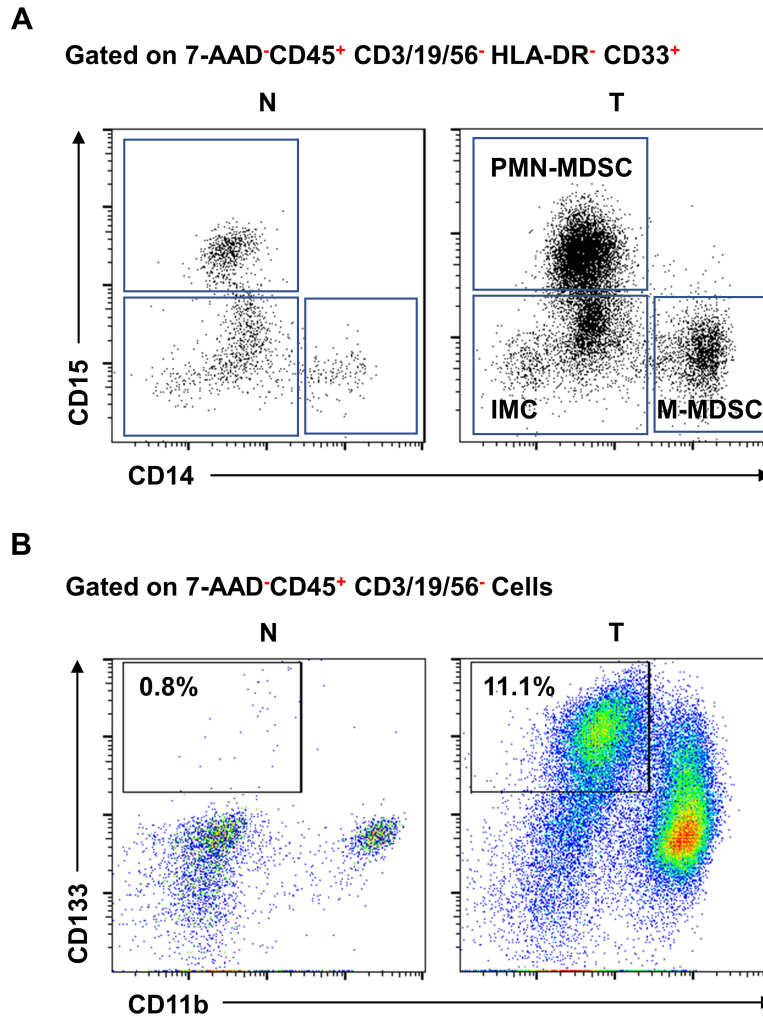

26

27 **Figure S2.**

28 **PMN-MDSC and myeloid precursors were accumulated in CRC tissues.** (A) Mononuclear cells  
 29 were isolated from paired tumor (T) and adjacent non-tumor (N) tissues by Ficoll density gradient  
 30 centrifugation. Flow cytometry analysis identified myeloid subsets in 7-AAD<sup>-</sup> CD45<sup>+</sup> CD3/19/56<sup>-</sup>  
 31 HLA-DR<sup>-</sup> CD33<sup>+</sup> tumor-infiltrating suppressive myeloid cells. M-MDSC, monocytic MDSC,  
 32 PMN-MDSC, polymorphonuclear MDSC, IMC, immature myeloid cell. (B) Myeloid precursors in  
 33 7-AAD<sup>-</sup> CD45<sup>+</sup> CD3/19/56<sup>-</sup> mononuclear cells was gated by CD133 and CD11b.

34



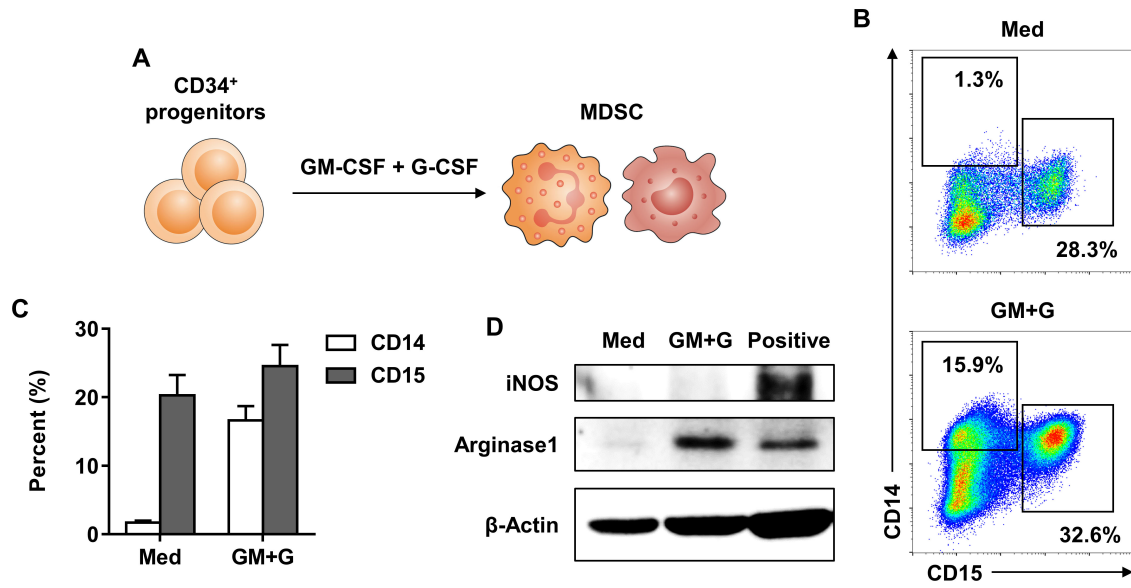

35

36 **Figure S3.**

37 **GM-CSF and G-CSF could induce the generation of ARG1 expressing PMN-MDSC. (A)**

38 Schematic flow of *in vitro* model to induce MDSC. CD34<sup>+</sup> precursors were cultured with medium

39 alone (Med) or combined cytokines (GM-CSF and G-CSF, GM+G) for 3 days. **(B and C)** The

40 proportion of CD14<sup>+</sup> monocytic and CD15<sup>+</sup> polymorphonuclear cells induced in (A) was monitored

41 by flow cytometry (B) and summarized as mean ± SEM in (C). **(D)** Immunoblot for ARG1 and

42 iNOS expression in GM-CSF and G-CSF induced myeloid cells.

43

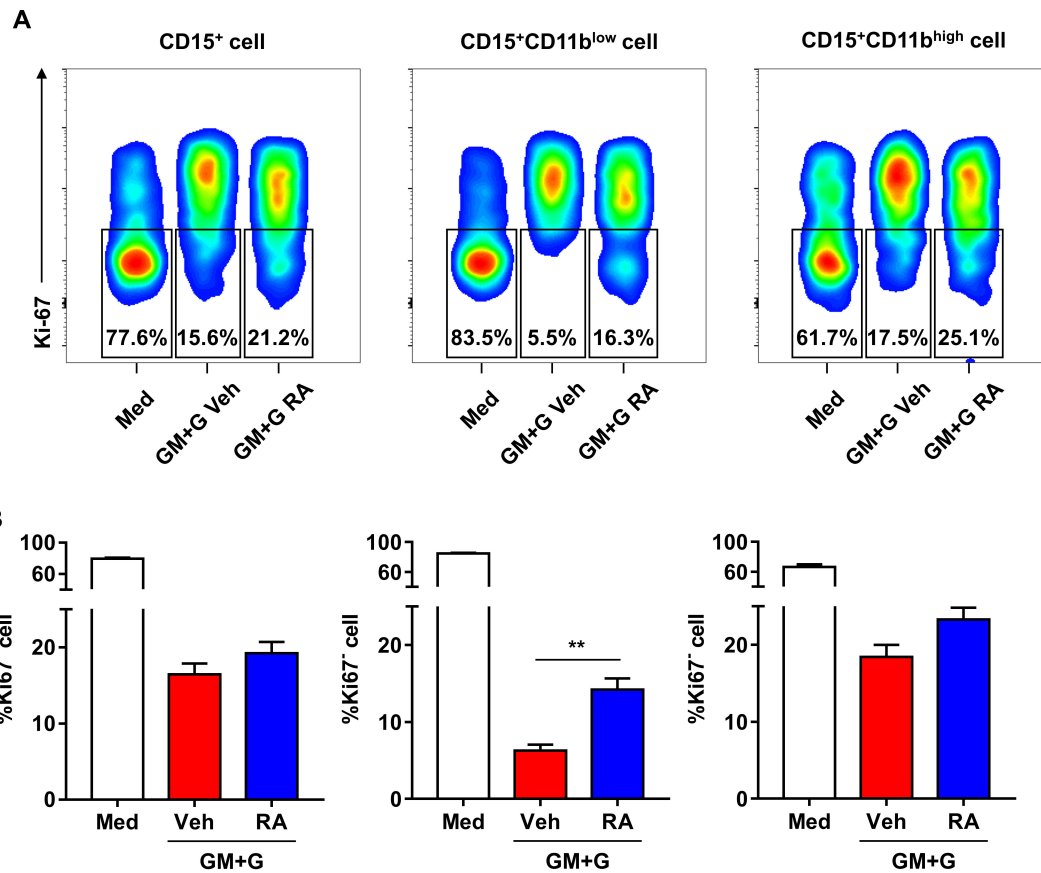

**Figure S4.**

**Retinoic acid slightly impairs the proliferation of cytokine-induced myeloid cells.** (A) CD34<sup>+</sup> precursors were cultured with medium alone (Med) or combined cytokines (GM+G) in the presence of vehicle (Veh) or retinoic acid (RA) for 3 days. The proliferation of CD15<sup>+</sup>, CD15<sup>+</sup>CD11b<sup>low</sup>, and CD15<sup>+</sup>CD11b<sup>high</sup> myeloid cells was monitored by flow cytometry. (B) The proportion of Ki-67<sup>+</sup> non-proliferating cells in each myeloid subset from four samples were summarized as mean  $\pm$  SEM.

**\*\***,  $P < 0.01$ .

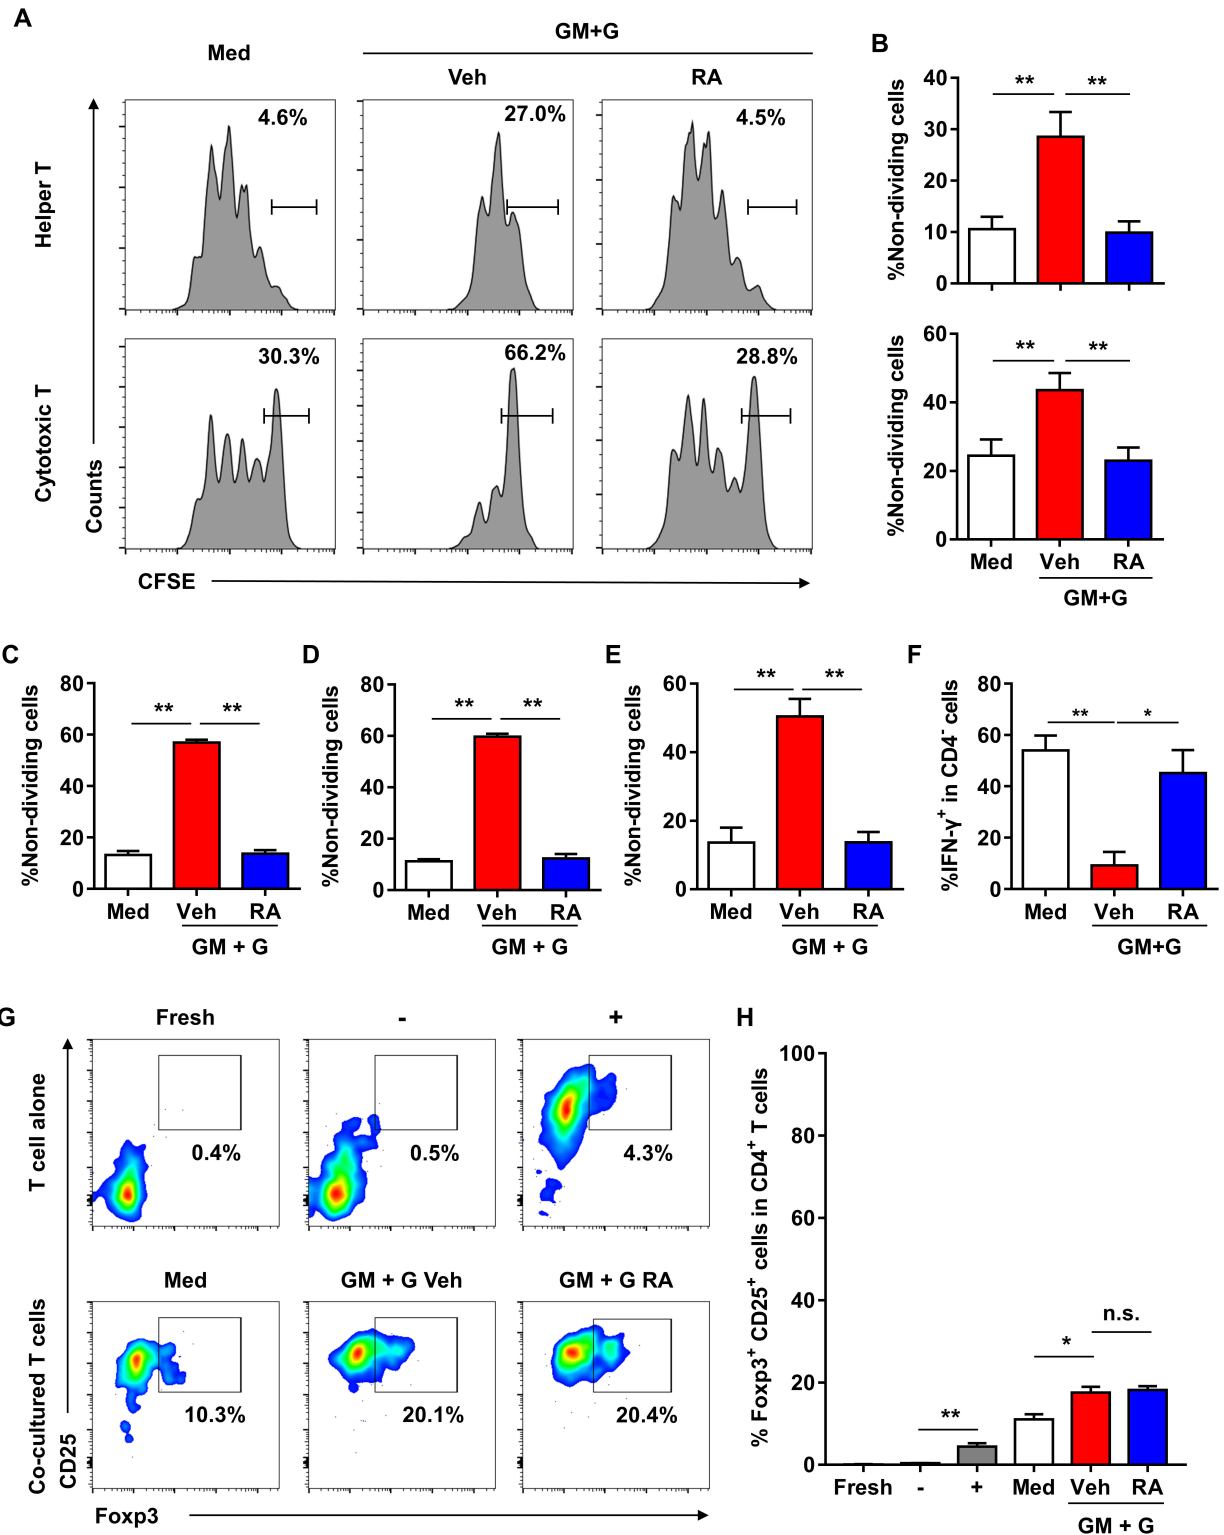

53

54 **Figure S5.**

55 **Retinoic acid could abrogate the suppressive function of MDSC. (A and B)** Myeloid cells  
 56 induced with indicated conditions were washed and then co-cultured CFSE-labeled T cells at the

57 ratio 1:2 in the presence of coated anti-CD3 and soluble anti-CD28 antibody for 5 days. The  
 58 proliferation of helper and cytotoxic T cells was examined by FACS to assess the suppressive  
 59 capacity of myeloid cells (A). Data represents 11 samples and are shown as mean  $\pm$  SEM in (B). \*\*,  
 60  $P < 0.01$ . (C – E) Myeloid cells were also cocultured with CFSE-labeled T cells at the ratio 1:1 in  
 61 the presence of coated anti-CD3 and soluble anti-CD28 antibodies for 5 days. The percentage of  
 62 non-dividing T cells in pan (C), helper (D) and cytotoxic (E) T cells are shown as the means  $\pm$  SEM  
 63 ( $n = 4$ ). \*\*,  $P < 0.01$ . (F) Myeloid cells induced with indicated conditions were washed and then  
 64 co-cultured with anti-CD3/CD28 antibody activated T cells for 5 days. The expression of IFN- $\gamma$  in  
 65 CD4<sup>+</sup> T cells was examined by FACS. Data from three independent experiments are summarized as  
 66 mean  $\pm$  SEM. \*,  $P < 0.05$ . (G) Pan T cells were isolated (Fresh) and then cultured with (+) or  
 67 without (-) anti CD3/28 stimulation or co-cultured with MDSC induced under indicated conditions  
 68 with anti CD3/28 stimulation for 5 days. The percentage of regulatory T cells in CD4<sup>+</sup> T cells was  
 69 determined by the co-expression of Foxp3 and CD25 through flow cytometry. (H) The percentage  
 70 of regulatory CD4 T cells in (G) was summarized as mean  $\pm$  SEM in (H) ( $n = 4$ ). \*,  $P < 0.05$ ; \*\*,  $P$   
 71  $< 0.01$ .

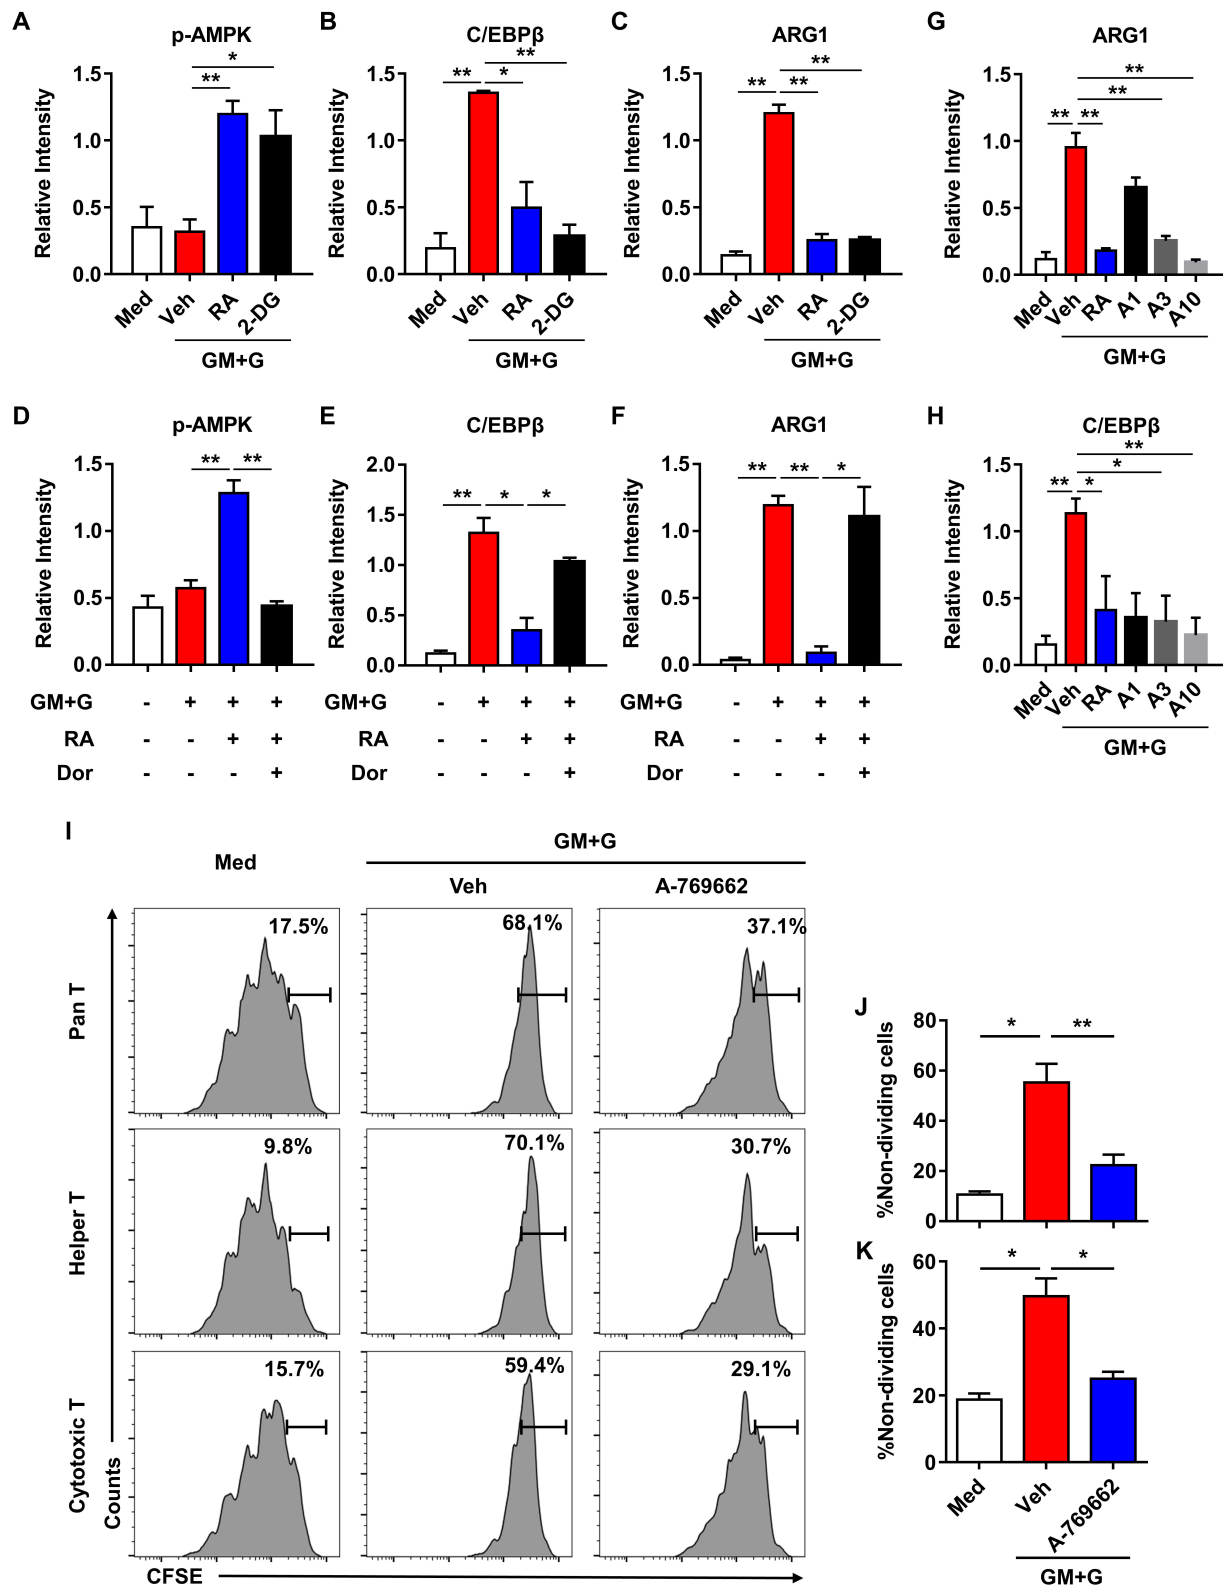

72

73 **Figure S6.**

74 **AMPK activation could impair the suppressive capacity of MDSC.** (A - C) Relative expression  
 75 intensity of p-AMPK (A), C/EBPβ (B) and ARG1 (C) as in Figure 4D from three samples are

76 shown as the means  $\pm$  SEM. \*,  $P < 0.05$ , \*\*,  $P < 0.01$ . (**D - F**) Relative expression intensity of  
77 p-AMPK (D), C/EBP $\beta$  (E) and ARG1 (F) as in Figure 4G from four samples are shown as the  
78 means  $\pm$  SEM. \*,  $P < 0.05$ , \*\*,  $P < 0.01$ . (**G and H**) Relative intensity of ARG1 (G) and C/EBP $\beta$  (H)  
79 as in Figure 4H from three samples are shown as the means  $\pm$  SEM. \*,  $P < 0.05$ , \*\*,  $P < 0.01$ . (**I**)  
80 Myeloid cells were induced with medium alone (Med) or cytokines (GM+G) in the presence of  
81 vehicle (Veh) or A-769662 for 3 days. These myeloid cells were washed and then co-cultured  
82 CFSE-labeled T cells in the presence of anti-CD3 and anti-CD28 antibody for 5 days. The  
83 proliferation of pan, helper and cytotoxic T cells was detected by FACS to assess the suppressive  
84 capacity of myeloid cells. (**J and K**) The proportion of non-dividing helper (J) and cytotoxic (K) T  
85 cells are shown as mean  $\pm$  SEM.  $n = 3$ ; \*,  $P < 0.05$ ; \*\*,  $P < 0.01$ .

86

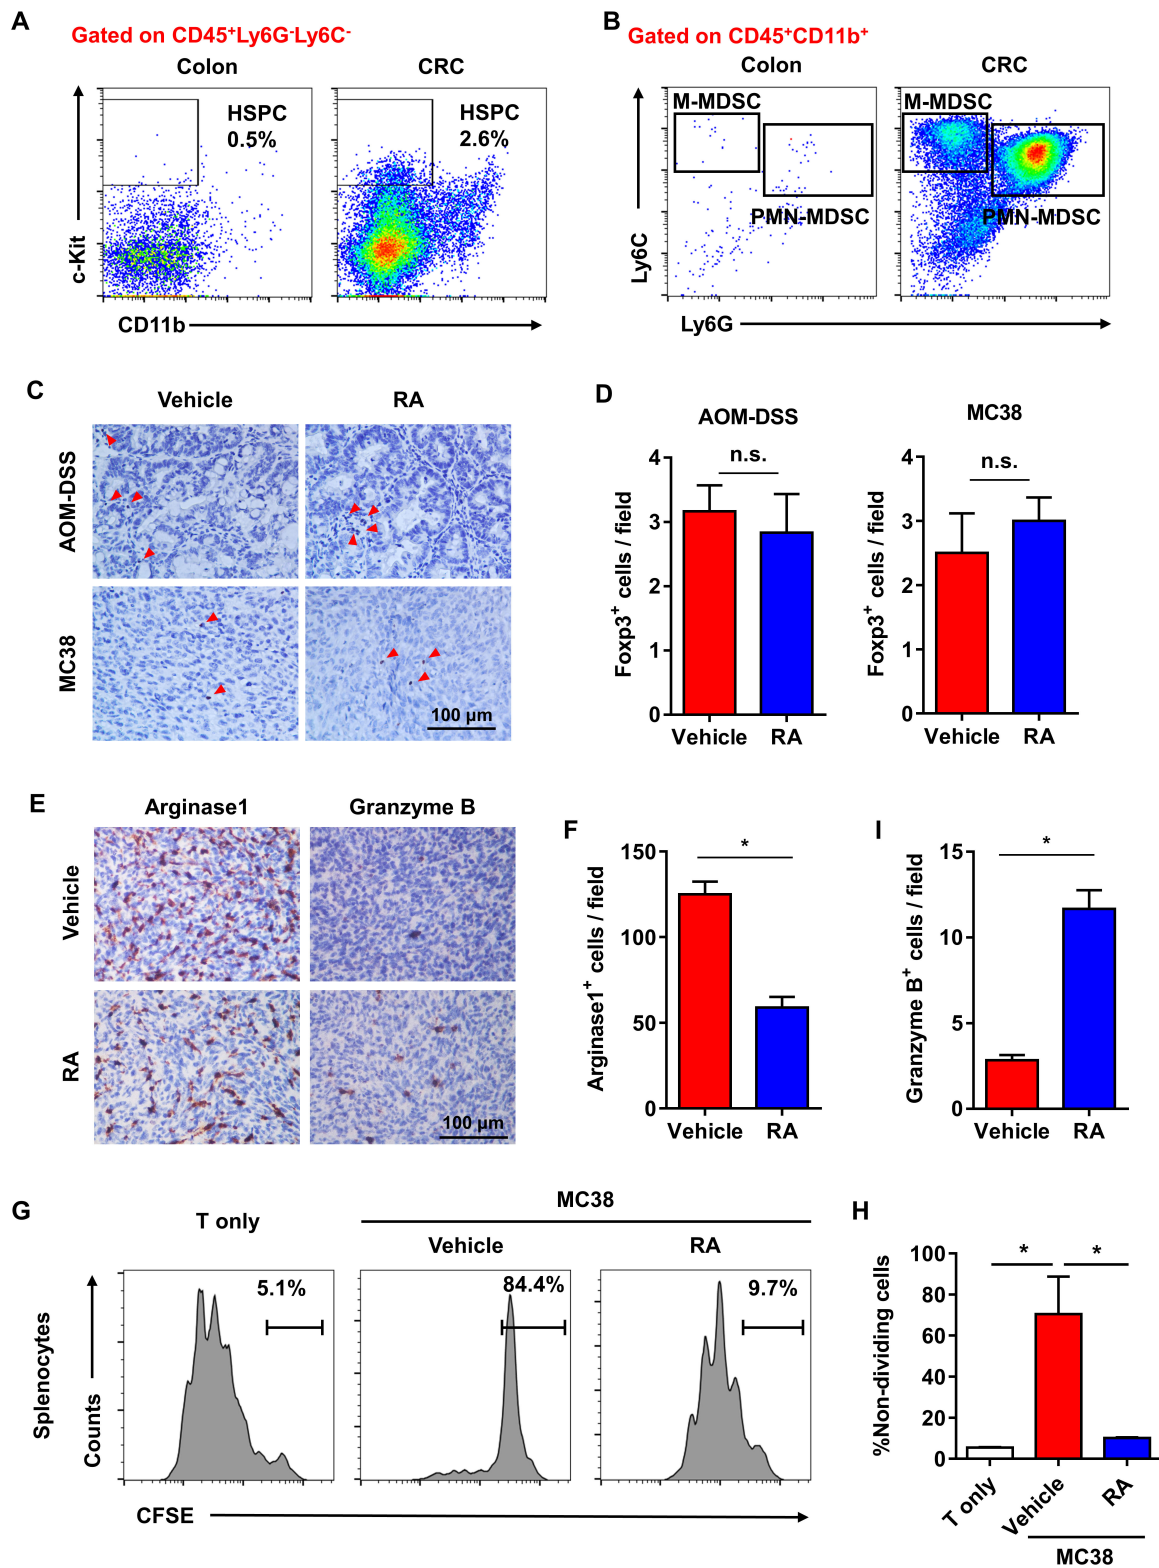

87

88 **Figure S7.**

89 **Supplementation of retinoic acid could abrogate the function of MDSC in mouse. (A and B)**

90 Mononuclear cells were isolated from CRC tissues of AOM-DSS treated mouse or colon tissue of

91 healthy littermate. Hematopoietic stem and progenitor cells (HSPC) in CD45<sup>+</sup>Ly6G<sup>-</sup>Ly6C<sup>-</sup> cells was  
92 gated by c-Kit and CD11b (A). M-MDSC and PMN-MDSC subsets in CD45<sup>+</sup>CD11b<sup>+</sup> cells were  
93 gated by Ly6G and Ly6C (B). (C) IHC staining detected foxp3 expression in tumor tissues from  
94 vehicle- or RA-treated mice. Red arrow, foxp3<sup>+</sup> cells. (D) Number of foxp3<sup>+</sup> cells in AOM-DSS  
95 induced CRC (left) and MC38 tumor (right) were quantified and summarized as the means  $\pm$  SEM.  
96 n = 6/group. (E) Immunohistochemistry staining detected arginase 1 and granzyme B expression in  
97 MC38 tumor from vehicle or retinoic acid treated mice. (F) Number of arginase 1<sup>+</sup> cells in (E) were  
98 quantified and summarized as mean  $\pm$  SEM. n = 6/group; \*,  $P < 0.05$ . (G and H) Tumor-infiltrating  
99 myeloid cells from MC38 mice treated with vehicle or retinoic acid were purified and co-cultured  
100 with CFSE-labeled splenocytes for 3 days in the presence of anti-CD3 and anti-CD28 antibody. The  
101 proliferation of splenocytes was monitored by FACS (G). Data from three samples were  
102 summarized as mean  $\pm$  SEM in (H). \*,  $P < 0.05$ . (I) Number of granzyme B<sup>+</sup> cells in (E) were  
103 counted and shown as mean  $\pm$  SEM. n = 6/group; \*,  $P < 0.05$ .

104



105    **Supplementary Table**

106    **Table S1. Summary of materials.**

| Materials            | Manufacturer    | Cat. No.        |
|----------------------|-----------------|-----------------|
| <b>1. Antibodies</b> |                 |                 |
| CD33-APC             | Beckman Coulter | Cat#IM2471      |
| CD45-Krome Orange    | Beckman Coulter | Cat#A96416      |
| CD3-PC5.5            | eBioscience     | Cat#45-0037     |
| CD19-PC5.5           | eBioscience     | Cat#45-0199     |
| CD56-PC5.5           | eBioscience     | Cat#35-0567     |
| CD11b-PE-Cy7         | Beckman Coulter | Cat#A54822      |
| HLA-DR-PE-CF594      | BD Pharmingen   | Cat#562304      |
| CD14-AF700           | BD Pharmingen   | Cat#557923      |
| CD15-EF450           | eBioscience     | Cat#48-0159     |
| CD15-FITC            | eBioscience     | Cat#11-0159     |
| CD133/2-PE           | Miltenyi Biotec | Cat#130-090-853 |
| IFN- $\gamma$ -EF450 | eBioscience     | Cat#48-7319-42  |
| CD4-PE-Cy7           | eBioscience     | Cat#25-0049-42  |
| Ki67-PE              | BD Pharmingen   | Cat#556027      |
| CD45-BV605           | BioLegend       | Cat#103140      |
| Ly6G-PE-CF594        | BD Biosciences  | Cat#562700      |
| CD11b-PE-Cy7         | BD Biosciences  | Cat#561098      |

|                                     |                |                 |
|-------------------------------------|----------------|-----------------|
| Ly6C-AF647                          | BioLegend      | Cat#128009      |
| CD8a-AF700                          | BD Biosciences | Cat#557959      |
| c-Kit-BV421                         | BioLegend      | Cat#105827      |
| Functional grade anti-CD3 antibody  | eBioscience    | Cat#16-0037-85  |
| Functional grade anti-CD28 antibody | eBioscience    | Cat#16-0289-85  |
| LEAF™ Purified anti-mouse CD3ε      | BioLegend      | Cat#100314      |
| LEAF™ Purified anti-mouse CD28      | BioLegend      | Cat#102112      |
| rabbit anti-arginase1 antibody      | CST            | Cat#93668S      |
| rabbit anti-ADH1 antibody           | Abcam          | Cat#ab108203    |
| rabbit anti-RDH5 antibody           | Novus          | Cat#NBP2-15097  |
| rabbit anti-DHRS9 antibody          | Novus          | Cat#NBP1-89378  |
| mouse anti RIG-I antibody           | OriGene        | Cat#TA506141    |
| rabbit anti-human CD11b antibody    | Invitrogen     | Cat#PA5-29633   |
| Anti-granzyme B antibody            | Abcam          | Cat#ab4059      |
| anti-arginase1 antibody             | CST            | Cat#9819        |
| anti-phospho-AMPK antibody          | CST            | Cat#2535T       |
| anti-AMPK antibody                  | CST            | Cat#2532S       |
| anti-CEBP/β antibody                | Santa Cruz     | Cat#sc-7962     |
| anti-β-actin antibody               | CST            | Cat#4967        |
| HRP-linked anti-rabbit IgG antibody | CST            | Cat#7074S       |
| HRP-linked anti-mouse IgG antibody  | CST            | Cat#7076S       |
| CD34 MicroBeads kit                 | Miltenyi       | Cat#130-046-702 |

|                                                 |                |                 |
|-------------------------------------------------|----------------|-----------------|
| Pan T Cell Isolation Kit                        | Miltenyi       | Cat#130-096-535 |
|                                                 |                |                 |
| <b>2. Chemicals</b>                             |                |                 |
| Retinoic acid                                   | Sigma-Aldrich  | Cat#R2625       |
| CFSE                                            | eBioscience    | Cat#65-0850-84  |
| 2-DG                                            | Sigma-Aldrich  | Cat#D8375       |
| Dorsomorphin                                    | APExBio        | Cat#B3252-5     |
| A769662                                         | APExBio        | Cat#A3963-10    |
| AOM                                             | Sigma          | Cat#A5486       |
| DSS                                             | MP Biomedicals | Cat#0216011080  |
|                                                 |                |                 |
| <b>3. Recombinant Proteins</b>                  |                |                 |
| SCF                                             | R&D Systems    | Cat#255-SC-050  |
| FLT-3L                                          | R&D Systems    | Cat#308-FK-025  |
| TPO                                             | R&D Systems    | Cat#288-TP-025  |
| IL-3                                            | R&D Systems    | Cat#203-IL-010  |
| GM-CSF                                          | R&D Systems    | Cat#215-GM-010  |
| G-CSF                                           | R&D Systems    | Cat#214-CS-025  |
|                                                 |                |                 |
| <b>4. Commercial Assay Kits</b>                 |                |                 |
| SurePrint G3 Human Gene Expression v3 8x60K kit | Agilent        | Cat#G4851C      |

|                                        |                     |                |
|----------------------------------------|---------------------|----------------|
| 5X All-In-One RT MasterMix             | ABM                 | Cat#G492       |
| SYBR Green Real-time PCR MasterMix     | TOYOBO              | Cat#QPS-201    |
| Dako REAL™ EnVision™ detection systems | Dako                | Cat#K5007      |
| Seahorse XF Glycolysis Stress Test Kit | Seahorse Bioscience | Cat#103020-100 |
|                                        |                     |                |

## 5. Primers

|                         |               |                |
|-------------------------|---------------|----------------|
| GCGGTGGACATCAACAAGG     | Thermo Fisher | Human ADH1-F   |
| AACATAACAGGGAAGCCATCAT  | Thermo Fisher | Human ADH1-R   |
| CTGTGACCAACCTGGAGAGTCT  | Thermo Fisher | Human RDH5-F   |
| GATGCGCTGTTGCATTTTCAGGT | Thermo Fisher | Human RDH5-R   |
| CCAGAGAATGTCAAGAGGACTGC | Thermo Fisher | Human DHRS9-F  |
| CTGTAGTCCTCTAGTGTCAGCC  | Thermo Fisher | Human DHRS9-R  |
| CGCCAAGTCCAGAACCATAG    | Thermo Fisher | Human ARG1-F   |
| AGGTCCCCATAATCCTTCACAT  | Thermo Fisher | Human ARG1-R   |
| ATTGCTCTTCCCCTCCGCT     | Thermo Fisher | Human GLUT3-F  |
| ATCCTCAAAAGTCCTGCCACG   | Thermo Fisher | Human GLUT3-R  |
| GCCTCCCCTGGGTTTTACCT    | Thermo Fisher | Human HK3-F    |
| TCCCGCAACAGACTCACGAC    | Thermo Fisher | Human HK3-R    |
| GGCAGGAGAATGTGCTGGTCAT  | Thermo Fisher | Human PFKFB3-F |
| CATAAGCGACAGGCGTCAGTTTC | Thermo Fisher | Human PFKFB3-R |
| GGAATGAATGTTGCTGGTGTCT  | Thermo Fisher | Human LDHA-F   |
| AGTCCAATAGCCCAGGATGTG   | Thermo Fisher | Human LDHA-R   |

|                         |               |               |
|-------------------------|---------------|---------------|
| AGAAGACCGTGGACAAGCACAG  | Thermo Fisher | Human CEBPB-F |
| CTCCAGGACCTTGTGCTGCGT   | Thermo Fisher | Human CEBPB-R |
| TCGATGCTCTTAGCTGAGTGTCC | Thermo Fisher | Human 18S-F   |
| TGATCGTCTTCGAACCTCCG    | Thermo Fisher | Human 18S-R   |
|                         |               |               |
